# Supplementary material for: Spatial and Functional Heterogeneities Shape Collective Behavior of Tumor-Immune Networks
Source: PLOS journal article supplement (doi:10.1371/journal.pcbi.1004181), 2015-04-23

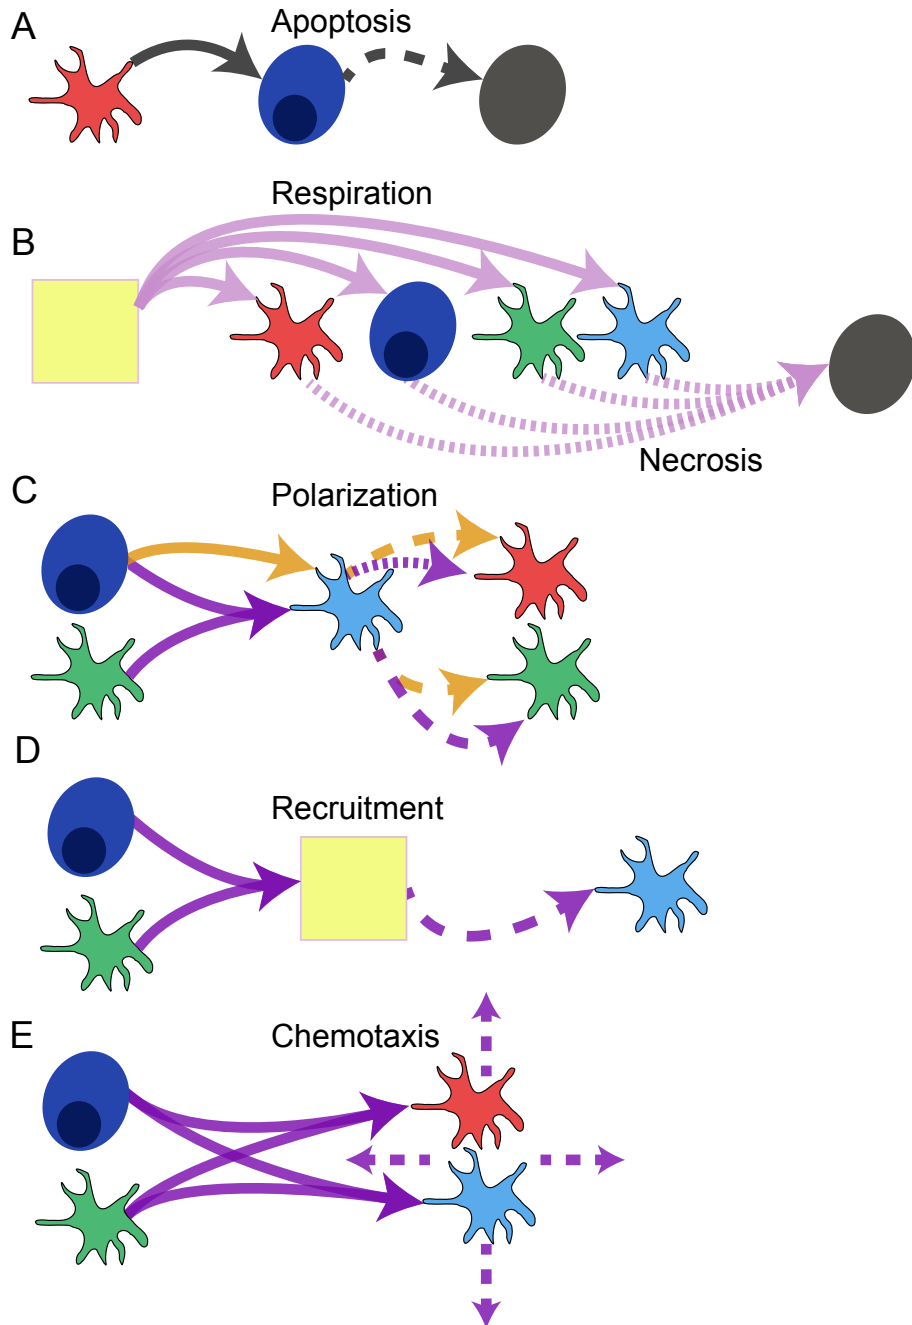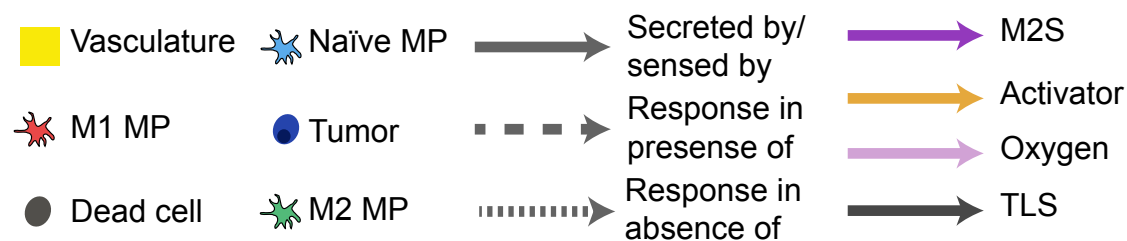

Supplement: S1 (10.1371/journal.pcbi.1004181.s001) [file journal.pcbi.1004181.s001]
